# Supplementary material for: RNA Sequencing of Arabidopsis thaliana Seedlings after Non-Thermal Plasma-Seed Treatment Reveals Upregulation in Plant Stress and Defense Pathways
Source: MDPI journal article supplement (doi:10.3390/ijms23063070), 2022-03-12
Supplement: s1 [file s1]

## Supplemental materials

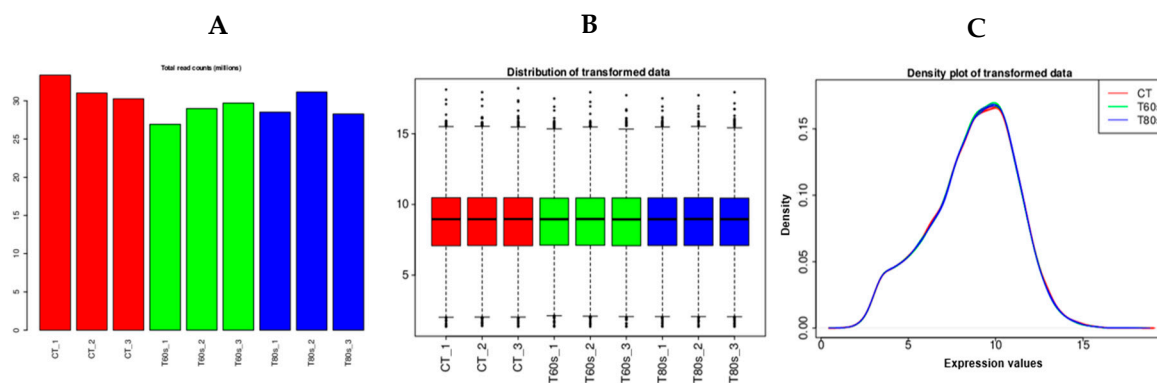

**Figure S1.** Quality control for control, 60 s and 80 s samples. (A) Genes retained in each sample (B) normalization of samples (C) density plot to demonstrate that profiles are similar to proceed with analysis.

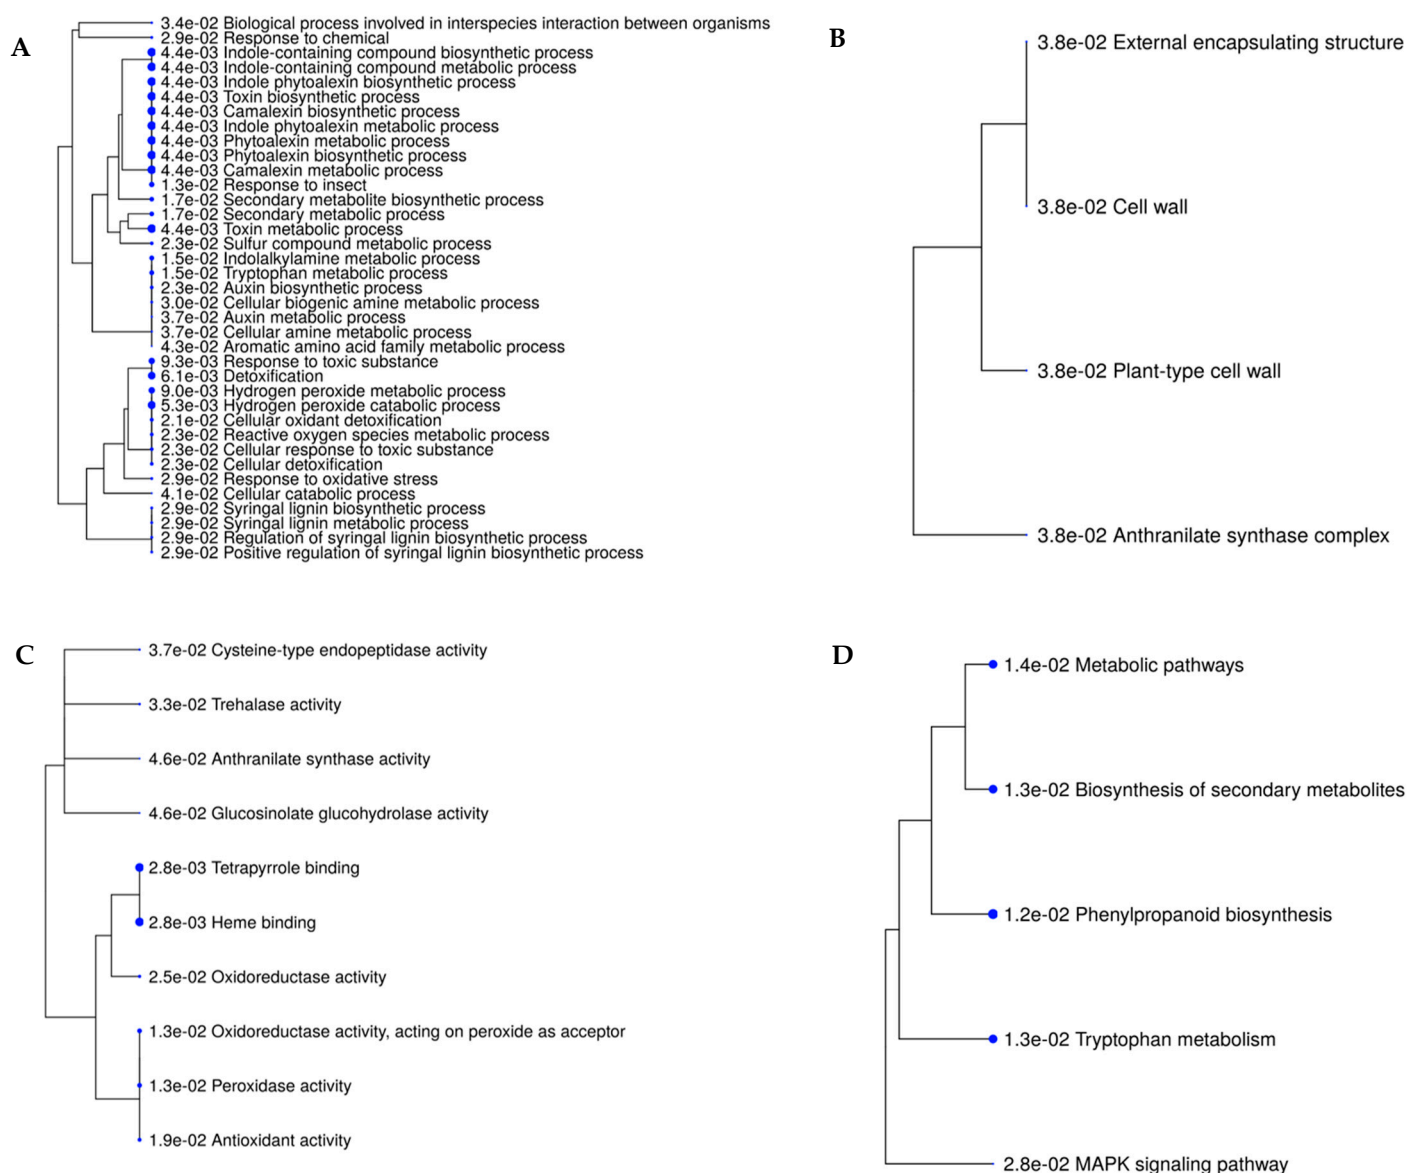

**Figure S2.** A hierarchical clustering tree for the upregulated genes after 60 s plasma treatment, summarizing the correlation among significant pathways within GO categories (A) biological process (B) cellular component (C) molecular function (D) KEGG pathway. Pathways with many shared genes are clustered together. Bigger dots indicate more significant P-values.

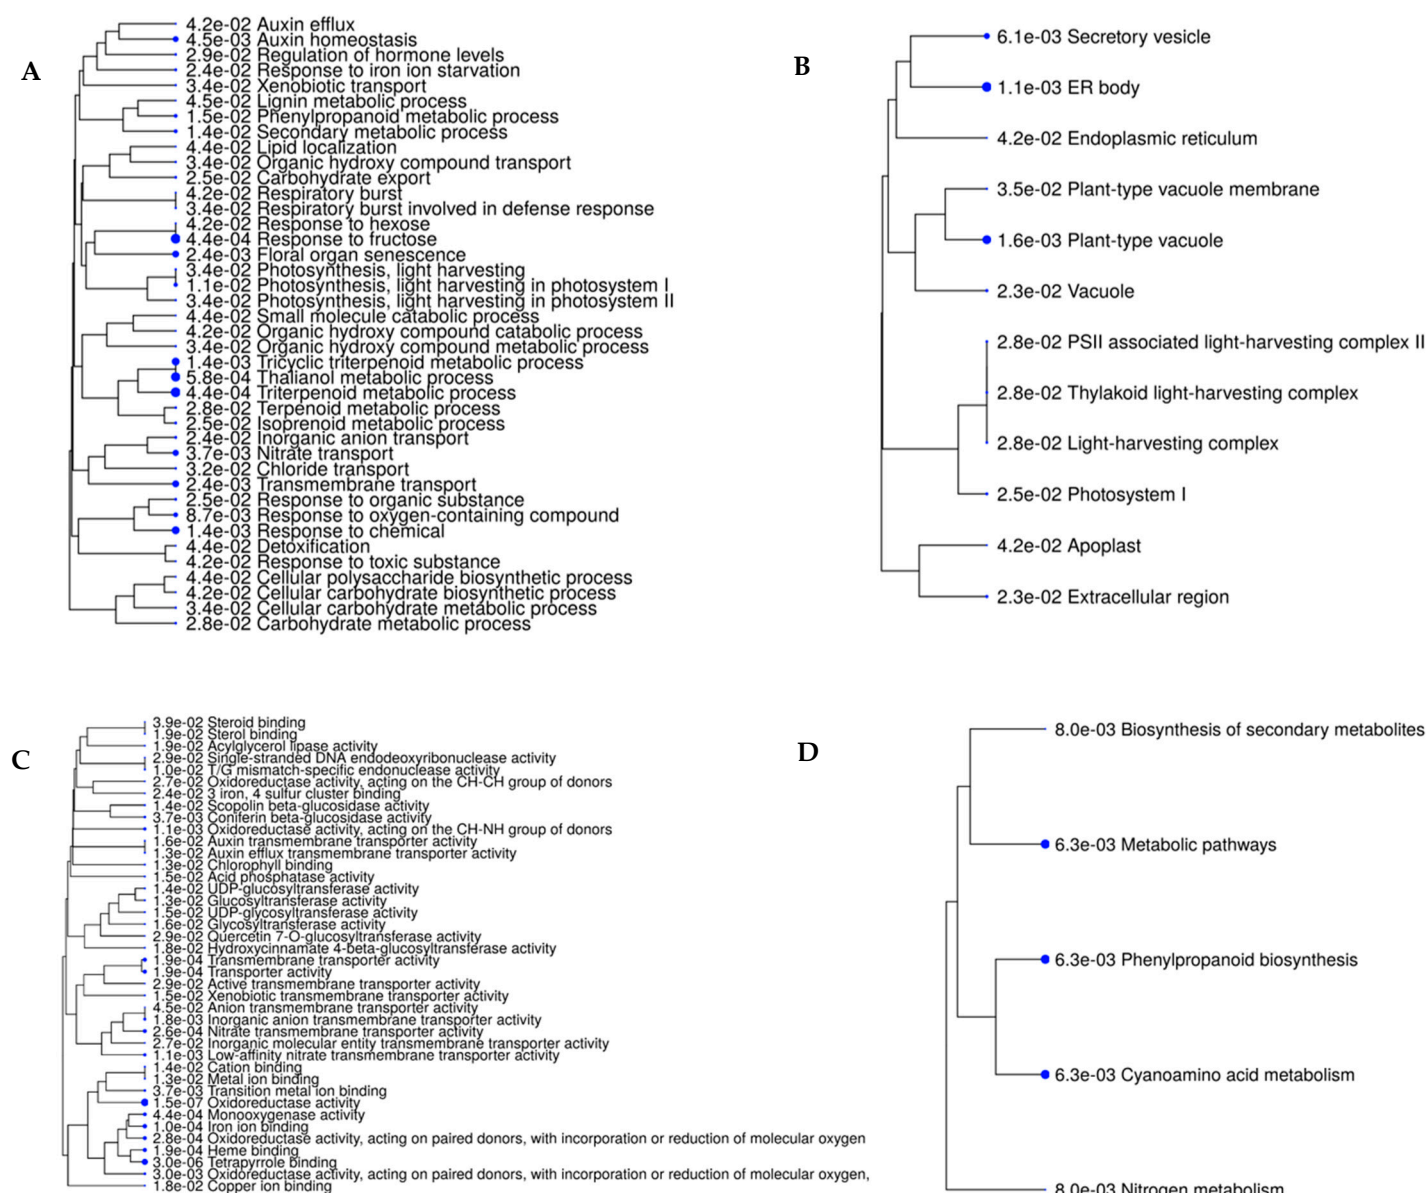

**Figure S3.** A hierarchical clustering tree for the downregulated genes after 60 s plasma treatment, summarizing the correlation among significant pathways within GO categories (A) biological process (B) cellular component (C) molecular function (D) KEGG pathway. Pathways with many shared genes are clustered together. Bigger dots indicate more significant P-values.

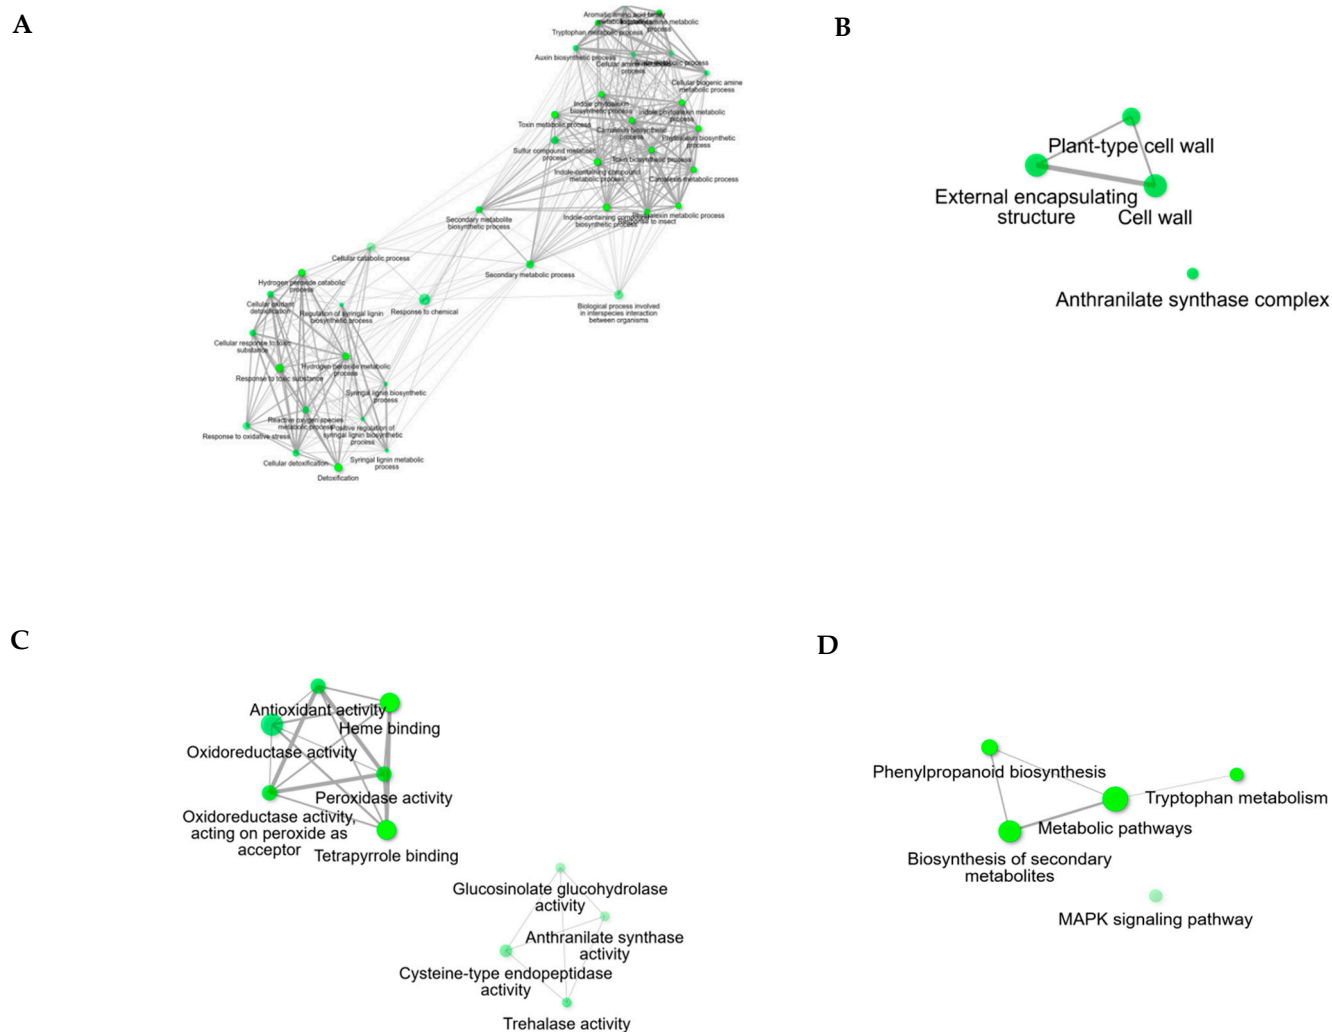

**Figure S4.** Gene upregulation after 60 s plasma treatment. Network maps show the relationship between enriched pathways in plasma-treated seedlings. From top to bottom, GO categories are in order: biological process, cellular component, molecular function, and KEGG pathway. Two pathways (nodes) are connected if they share 20% or more genes. Darker nodes are more significantly enriched gene sets. Bigger nodes represent larger gene sets. Thicker edges represent more overlapped genes.

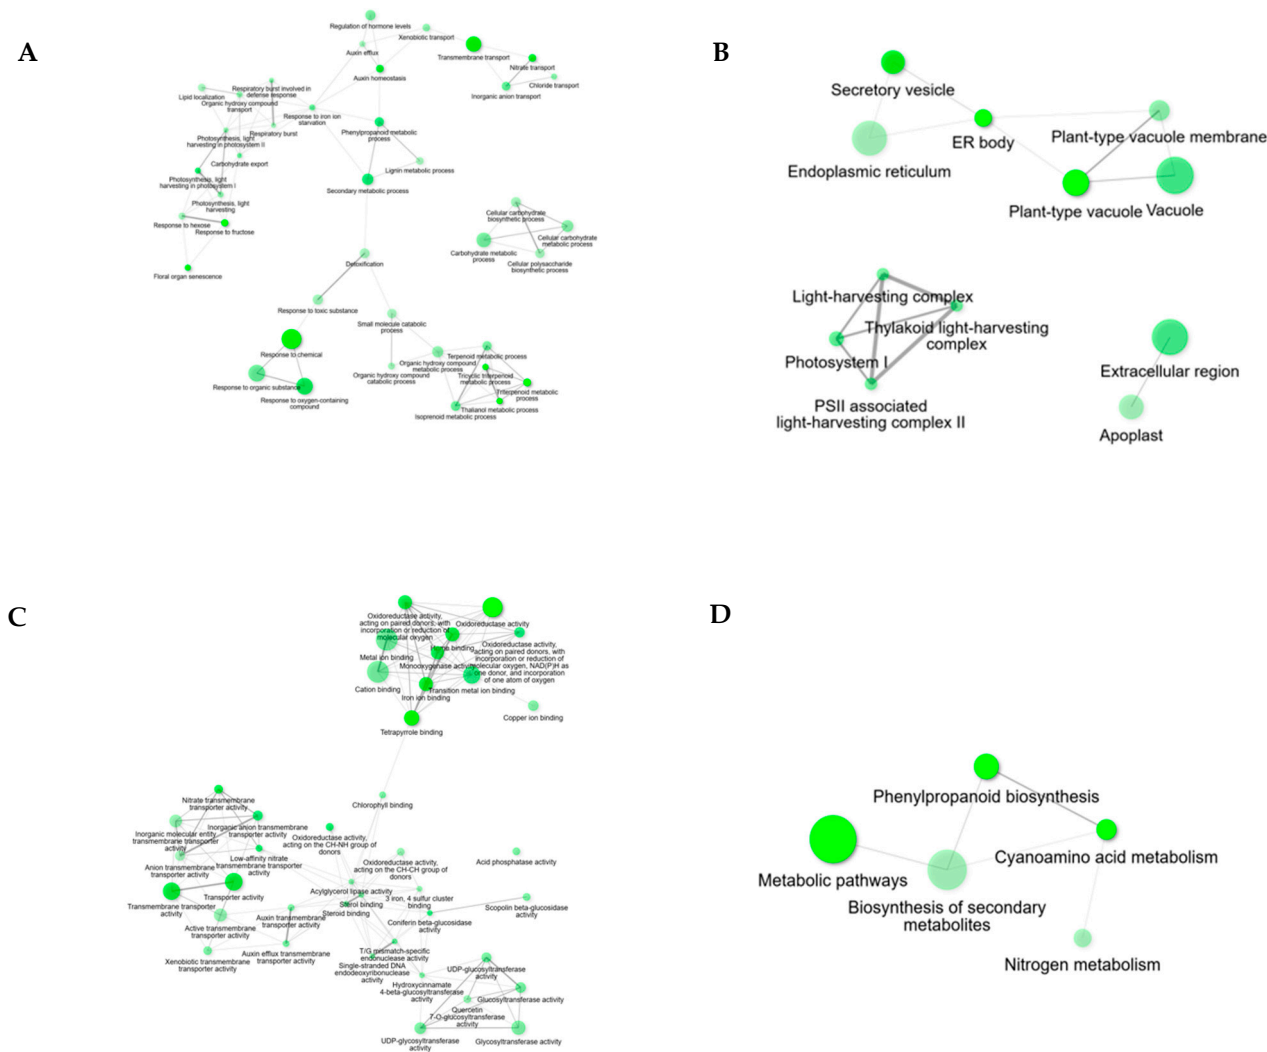

**Figure S5.** Gene downregulation after 60 s plasma treatment. Network maps show the relationship between enriched pathways in plasma-treated seedlings. From top to bottom, GO categories are in order: biological process, cellular component, molecular function, and KEGG pathway. Two pathways (nodes) are connected if they share 20% or more genes. Darker nodes are more significantly enriched gene sets. Bigger nodes represent larger gene sets. Thicker edges represent more overlapped genes.

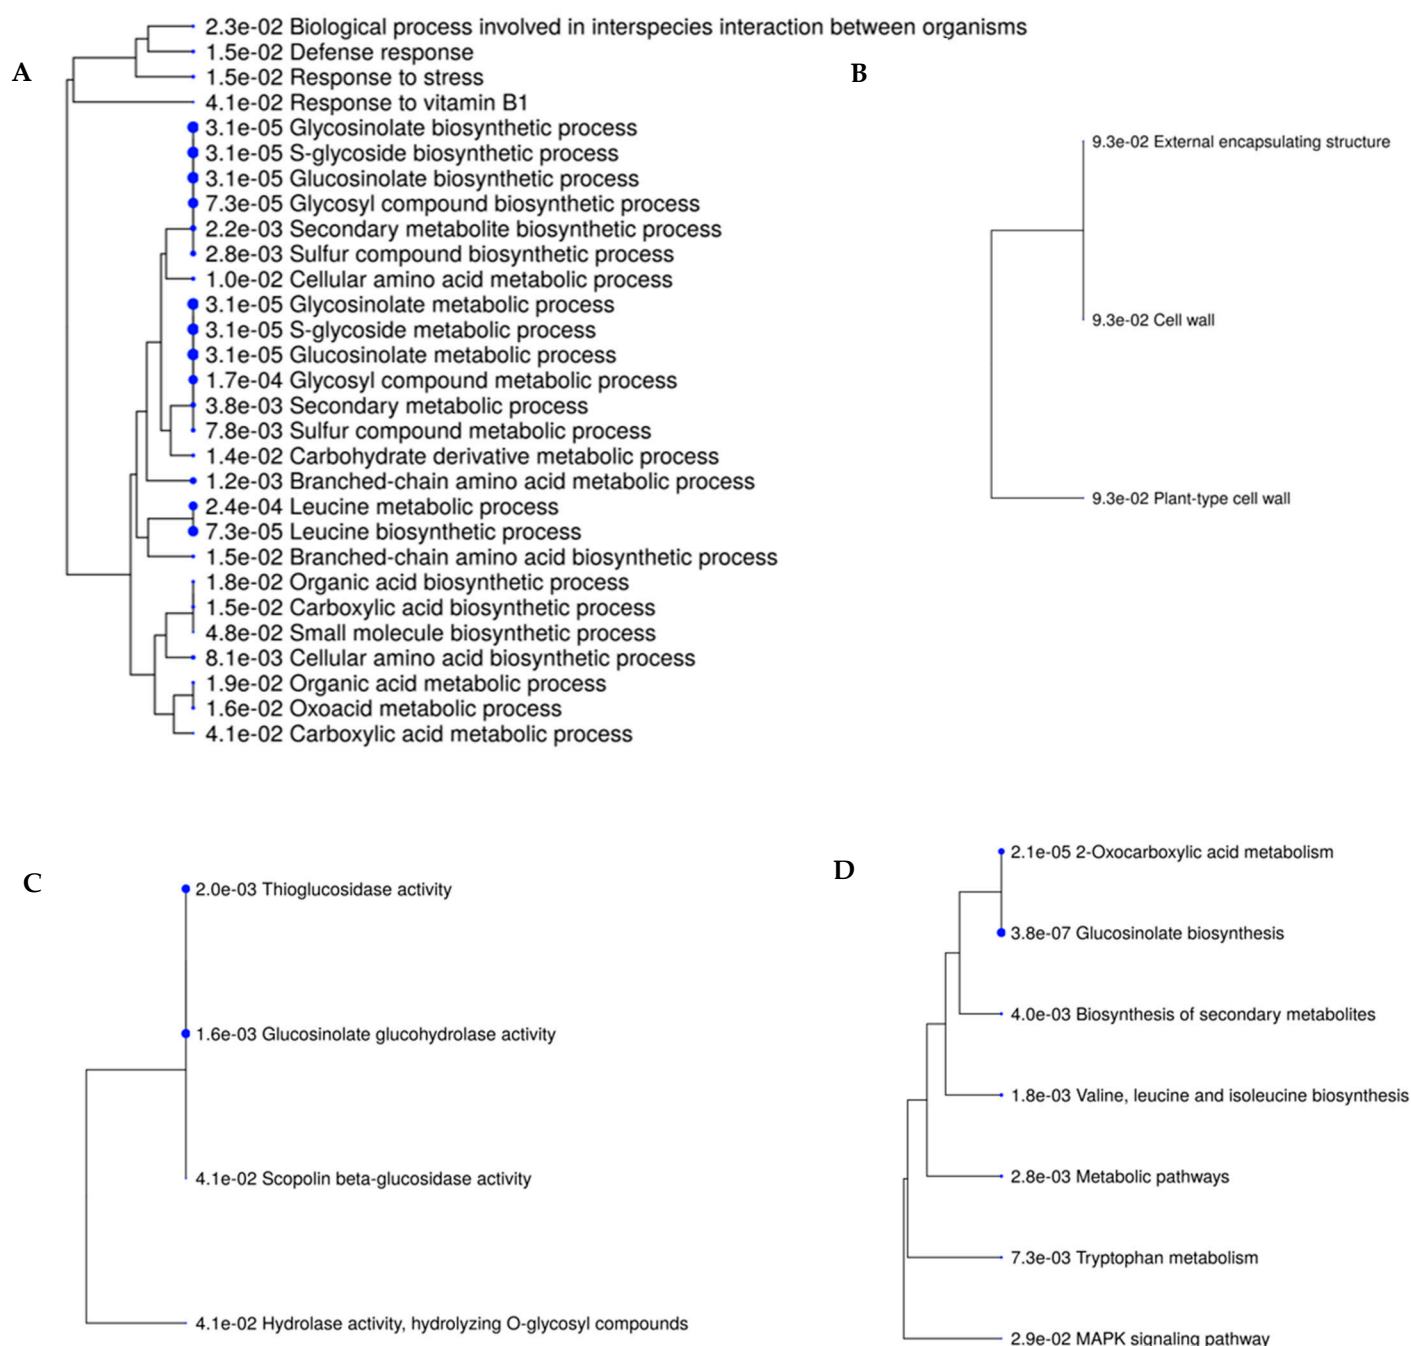

**Figure S6.** A hierarchical clustering tree for the upregulated genes after 80 s plasma treatment, summarizing the correlation among significant pathways within GO categories (A) biological process (B) cellular component (C) molecular function (D) KEGG pathway. Pathways with many shared genes are clustered together. Bigger dots indicate more significant P-values.



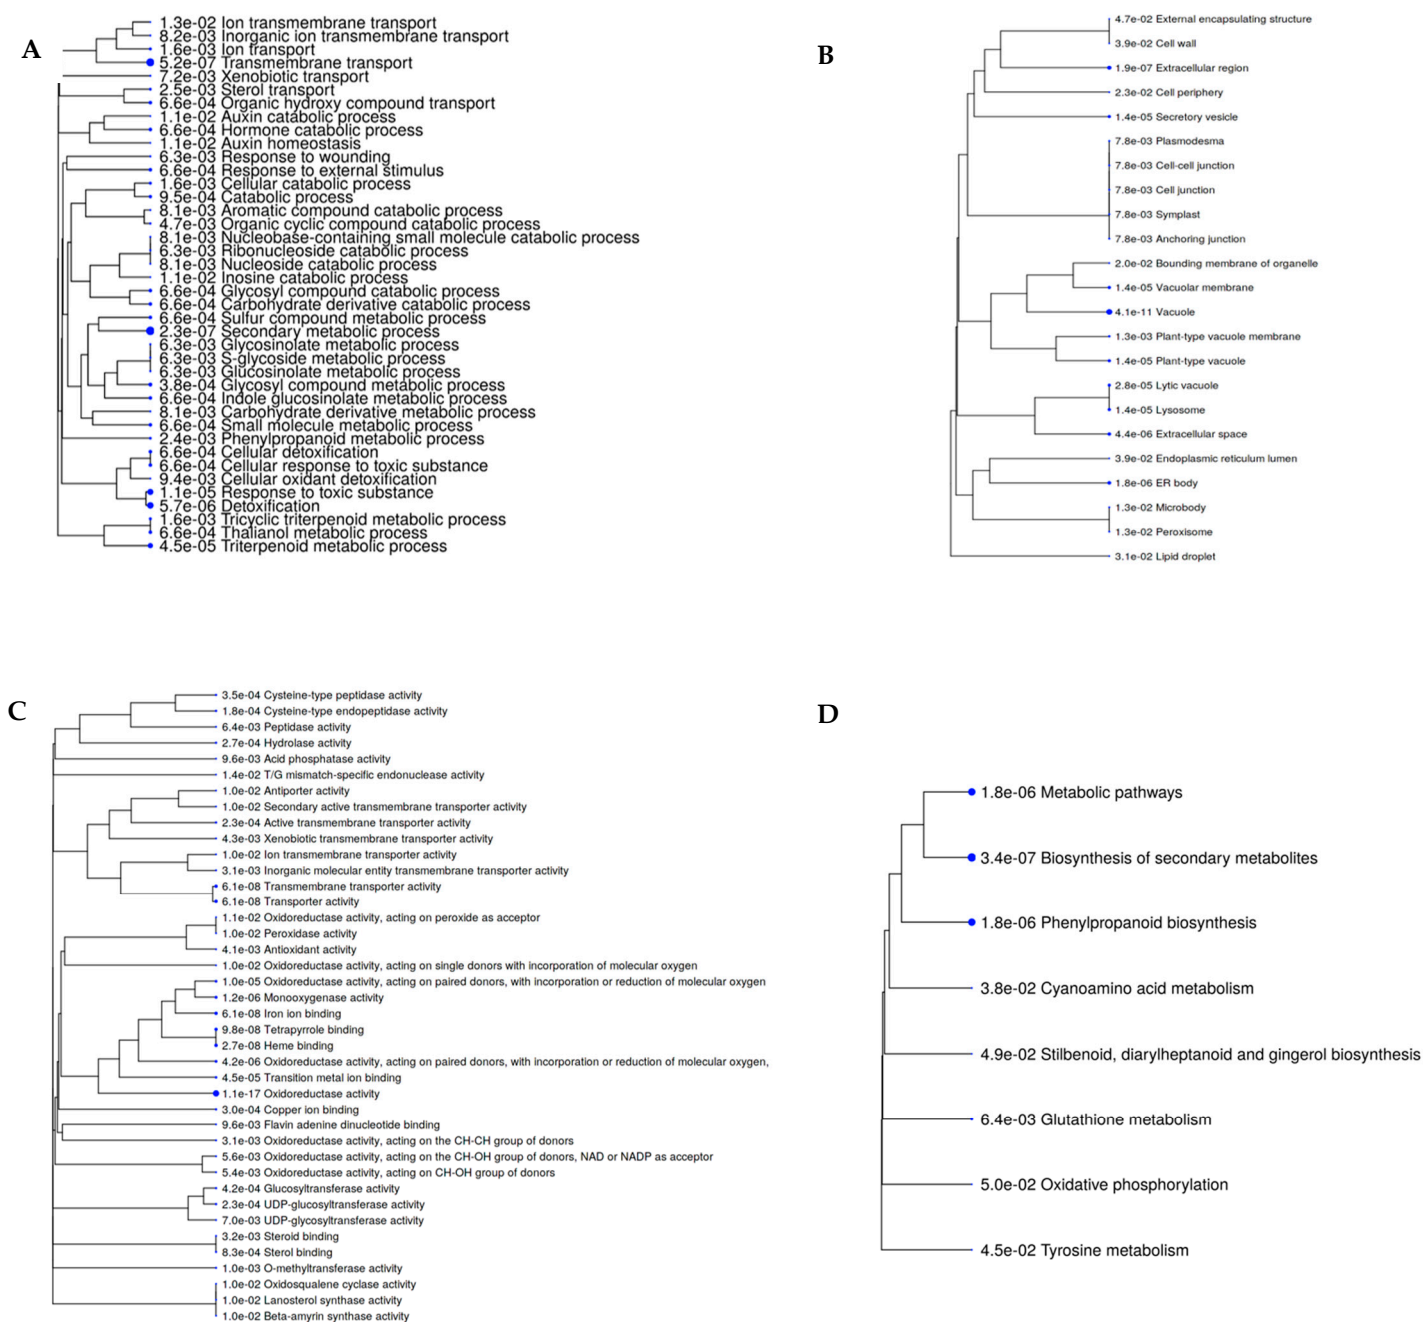

**Figure S7.** A hierarchical clustering tree for the downregulated genes after 80 s plasma treatment, summarizing the correlation among significant pathways within GO categories (A) biological process (B) cellular component (C) molecular function (D) KEGG pathway. Pathways with many shared genes are clustered together. Bigger dots indicate more significant P-values.

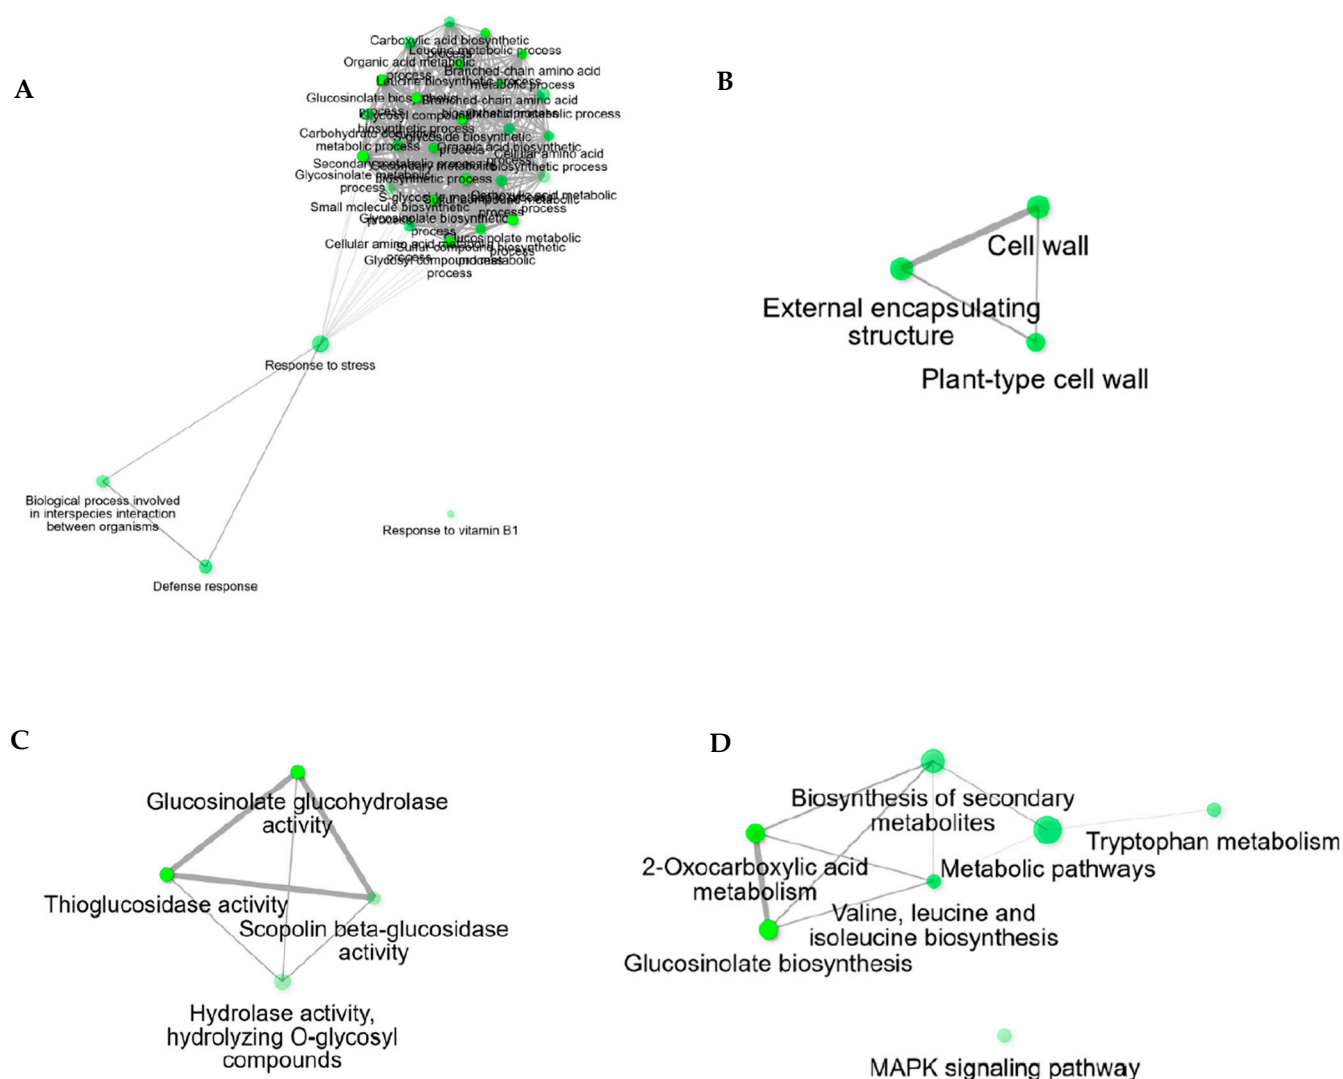

**Figure S8.** Gene upregulation after 80 s plasma treatment. From top to bottom, GO categories are in the following order: (A) biological process, (B) cellular component, (C) molecular function, and (D) KEGG pathway. Network maps show the relationship between enriched pathways in plasma-treated seedlings. Two pathways (nodes) are connected if they share 20% or more genes. Darker nodes are more significantly enriched gene sets. Bigger nodes represent larger gene sets. Thicker edges represent more overlapped genes.



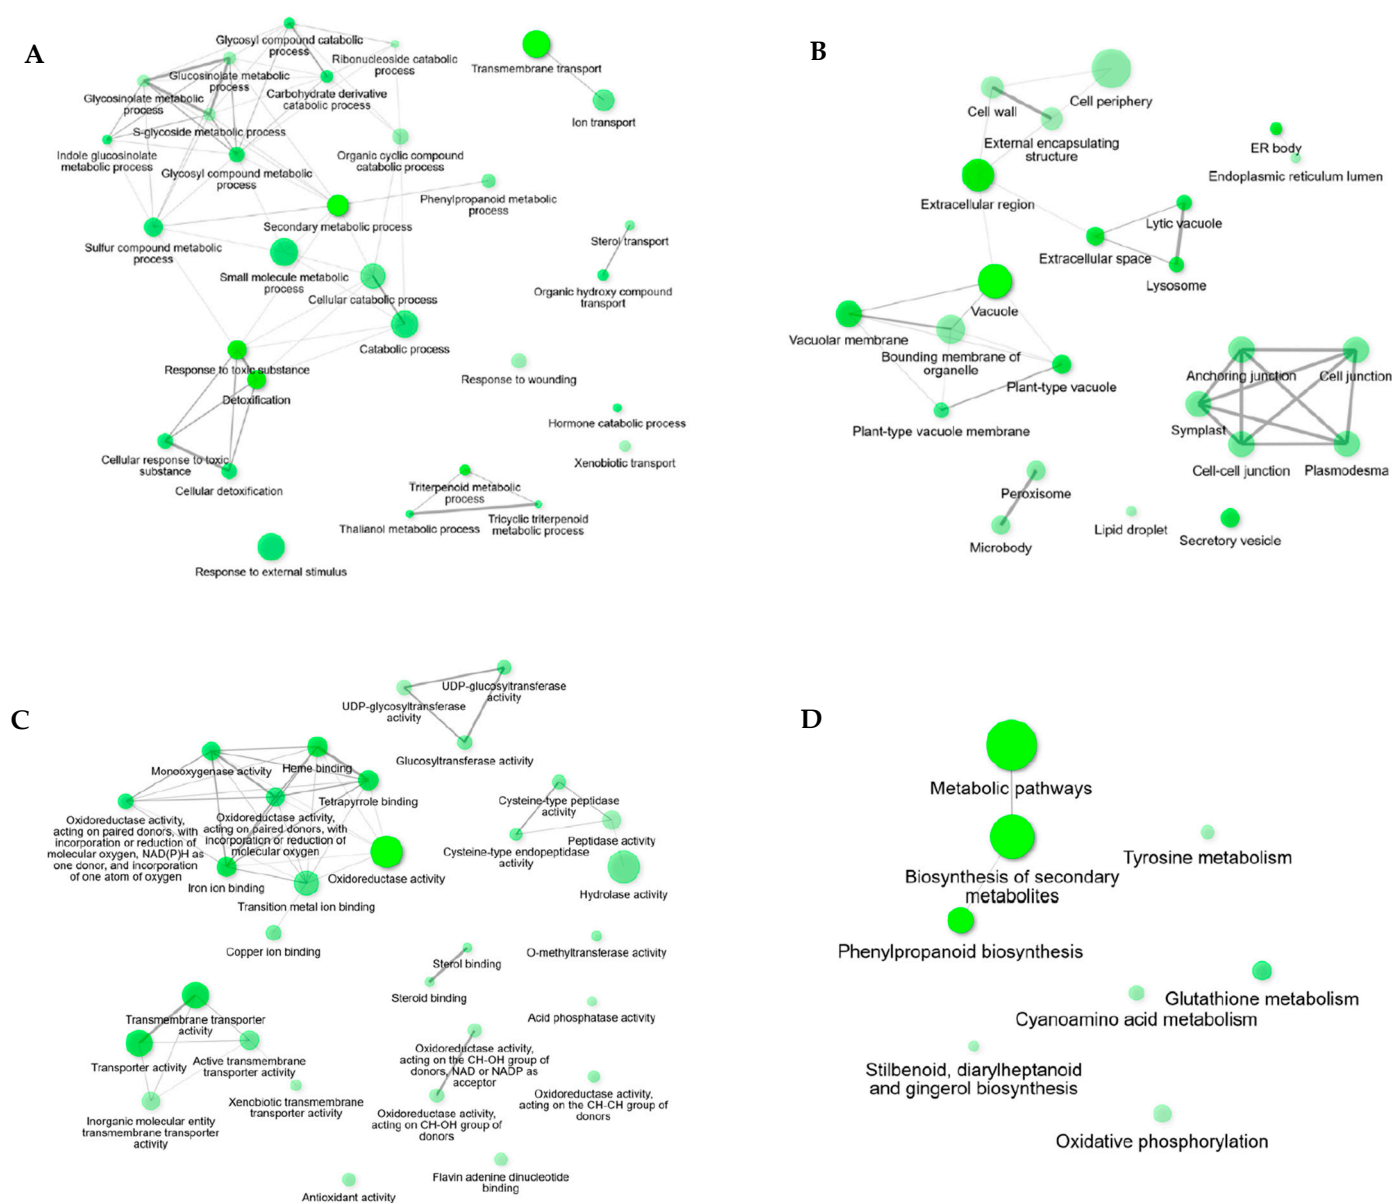

**Figure S9.** Gene downregulation after 80 s plasma treatment. From top to bottom, GO categories are in the following order: (A) biological process, (B) cellular component, (C) molecular function, and (D) KEGG pathway. Network maps show the relationship between enriched pathways in plasma-treated seedlings. Two pathways (nodes) are connected if they share 20% or more genes. Darker nodes are more significantly enriched gene sets. Bigger nodes represent larger gene sets. Thicker edges represent more overlapped genes.

**Table S1.** Number of NGS-RNA-seq reads before and after quality check on the raw sequencing data for 60 s and 80 s

| Sample name | Raw reads | Trimmed reads | Mean GC | Condition |
|-------------|-----------|---------------|---------|-----------|
| control 1   | 37031768  | 34794479      | 45      | control   |
| control 2   | 33884449  | 32507959      | 45      | control   |
| control 3   | 33288964  | 31830410      | 45      | control   |
| 60 s 1      | 29560591  | 28386155      | 45      | 60 s      |
| 60 s 2      | 31755491  | 30348719      | 45      | 60 s      |
| 60 s 3      | 32244438  | 31058363      | 45      | 60 s      |
| 80 s 1      | 31068712  | 29937596      | 45      | 80 s      |
| 80 s 2      | 33745593  | 32428165      | 45      | 80 s      |
| 80 s 3      | 31108401  | 29729217      | 45      | 80 s      |

**Table S2.** Number of clean reads mapped against *A. thaliana* genome for 60 s and 80 s

| Sample    | Input reads | Unique                 | Multi                | Unmapped              | Mismatch ratio | Assigned GTF           |
|-----------|-------------|------------------------|----------------------|-----------------------|----------------|------------------------|
| control 1 | 34794479    | 33792317<br>(97.1198%) | 555033<br>(1.59518%) | 447129<br>(1.28506%)  | 0.06%          | 33379423<br>(95.9331%) |
| control 2 | 32507959    | 31460285<br>(96.7772%) | 672683<br>(2.06929%) | 374991<br>(1.15354%)  | 0.06%          | 31023336<br>(95.433%)  |
| control 3 | 31830410    | 30686662<br>(96.4067%) | 681168<br>(2.13999%) | 462580<br>(1.45326%)  | 0.06%          | 30273545<br>(95.1089%) |
| 60 s 1    | 28386155    | 27435554<br>(96.6512%) | 679223<br>(2.3928%)  | 271378<br>(0.956022%) | 0.06%          | 26931867<br>(94.8768%) |
| 60 s 2    | 30348719    | 29391853<br>(96.8471%) | 567223<br>(1.86902%) | 389643<br>(1.28389%)  | 0.06%          | 29009927<br>(95.5886%) |
| 60 s 3    | 31058363    | 30157945<br>(97.1009%) | 587937<br>(1.89301%) | 312481<br>(1.00611%)  | 0.06%          | 29726503<br>(95.7118%) |
| 80 s 1    | 29937596    | 28988426<br>(96.8295%) | 662731<br>(2.21371%) | 286439<br>(0.956787%) | 0.06%          | 28514100<br>(95.2451%) |
| 80 s 2    | 32428165    | 31571882<br>(97.3594%) | 522820<br>(1.61224%) | 333463<br>(1.02831%)  | 0.06%          | 31166918<br>(96.1106%) |
| 80 s 3    | 29729217    | 28722931<br>(96.6152%) | 627181<br>(2.10965%) | 379105<br>(1.27519%)  | 0.06%          | 28292247<br>(95.1665%) |

**Table S3.** Comparison with Cui et al. 2021 paper

| <b>Variable</b>                   | <b>Cui et al. paper</b>                                                                           | <b>Waskow et al. paper</b>                                                                                     |
|-----------------------------------|---------------------------------------------------------------------------------------------------|----------------------------------------------------------------------------------------------------------------|
| <i>Plasma device</i>              | Hexagonal mesh SDBD                                                                               | Grid of stripes SDBD                                                                                           |
| <i>Plasma device materials</i>    | Copper and FR4                                                                                    | Metal paste on alumina ceramic                                                                                 |
| <i>Plasma-seed gap distance</i>   | 5 mm                                                                                              | 3.7 mm                                                                                                         |
| <i>Feed gas</i>                   | Ambient air                                                                                       | Synthetic air (80:20 N <sub>2</sub> :O <sub>2</sub> )                                                          |
|                                   | No flow given                                                                                     | 2 L/min controlled flow                                                                                        |
|                                   | RH 65%                                                                                            | RH 2%                                                                                                          |
| <i>Operating parameters</i>       | 8 kHz, 5 kV                                                                                       | 10 kHz, 8 kV,                                                                                                  |
|                                   | 2.5 W consumption                                                                                 | 2-3 W consumption,                                                                                             |
|                                   | 0.055 W/cm <sup>2</sup>                                                                           | 0.03 - 0.08 W/cm <sup>2</sup>                                                                                  |
| <i>Power supply</i>               | Continuous sinewave                                                                               | AC 10% duty cycle<br>modulated at 500 Hz                                                                       |
| <i>Temperature</i>                | 28.5°C                                                                                            | 31.8°C                                                                                                         |
| <i>Seed storage and handling</i>  | vernalized and stored with silica<br>gel,<br>sterilized seeds,<br>used ½ MS agar plates           | stored in a locked Eppendorf tube<br>dry conditions at room temperature,<br>not sterilized,<br>used water agar |
| <i>Plasma treatment procedure</i> | grew seedlings until 4 days,<br>transplanted to water,<br>plasma treated,<br>planted on ½ MS agar | plasma treated dry seeds,<br>planted on water agar                                                             |
| <i>Seed sample size</i>           | 35 seeds                                                                                          | 30 seeds                                                                                                       |
| <i>Light cycle</i>                | 23°C, 16 h light                                                                                  | 23°C, continuous light                                                                                         |
| <i>Plasma treatment time</i>      | 60 s                                                                                              | 60 s and 80 s                                                                                                  |
| <i>RNA extraction</i>             | 48 hours after plasma treatment<br>extracted from 6-day-old<br>seedlings                          | 144 hours after plasma treatment<br>extracted from 6-day-old seedlings                                         |
